# Supplementary material for: A detailed study of the electronic and optical properties of germanium nanotubes
Source: Royal Society of Chemistry journal article supplement (doi:10.1039/d4cp00812j), 2024-01-01
Supplement: d4cp00812j1.pdf [file d4cp00812j1.pdf]

# **A Detailed Study on the Electronic and Optical Properties of Germanium Nanotubes**

Hsin-Yi Liu<sup>1</sup>, Yu-Huang Chiu<sup>1</sup> and Jhao-Ying Wu<sup>2,\*</sup>

<sup>1</sup>Department of Applied Physics, National Pingtung University, Pingtung, Taiwan

<sup>2</sup>Department of Energy and Refrigerating Air-Conditioning Engineering, National

Kaohsiung University of Science and Technology, Kaohsiung, Taiwan

E-mail: yarst5@nkust.edu.tw

## **Supplementary Materials**

Table S1: The lowest conduction band energy  $E_{LCB}$ , the highest valence band energy  $E_{HVB}$ , and the energy gap  $E_g$ , where  $E_g = E_{LCB} - E_{HVB}$ .

| aGeNTs    | $E_{LCB}$<br>(eV) | $E_{HVB}$<br>(eV) | $E_g$<br>(eV) |
|-----------|-------------------|-------------------|---------------|
| Ge(2,2)   | 0.360             | -0.210            | 0.57          |
| Ge(3,3)   | 0.040             | -0.040            | 0.08          |
| Ge(4,4)   | 0.294             | -0.205            | 0.50          |
| Ge(5,5)   | 0.290             | -0.210            | 0.50          |
| Ge(6,6)   | 0.205             | -0.205            | 0.41          |
| Ge(7,7)   | 0.170             | -0.170            | 0.34          |
| Ge(8,8)   | 0.150             | -0.150            | 0.30          |
| Ge(9,9)   | 0.130             | -0.130            | 0.26          |
| Ge(10,10) | 0.125             | -0.115            | 0.24          |
| Ge(11,11) | 0.100             | -0.100            | 0.20          |
| Ge(12,12) | 0.098             | -0.092            | 0.19          |
| Ge(13,13) | 0.090             | -0.090            | 0.18          |
| Ge(15,15) | 0.075             | -0.075            | 0.15          |

| $z\text{GeNTs}$ | $E_{LCB}$<br>(eV) | $E_{HVB}$<br>(eV) | $E_g$<br>(eV) |
|-----------------|-------------------|-------------------|---------------|
| Ge(4,0)         | -                 | -                 | 0             |
| Ge(5,0)         | -                 | -                 | 0             |
| Ge(6,0)         | -                 | -                 | 0             |
| Ge(7,0)         | -                 | -                 | 0             |
| Ge(8,0)         | 0.090             | -0.090            | 0.18          |
| Ge(9,0)         | 0.130             | -0.130            | 0.26          |
| Ge(10,0)        | 0.200             | -0.200            | 0.40          |
| Ge(11,0)        | 0.200             | -0.200            | 0.40          |
| Ge(13,0)        | 0.230             | -0.210            | 0.44          |
| Ge(15,0)        | 0.160             | -0.120            | 0.28          |
| Ge(21,0)        | 0.04              | -0.140            | 0.18          |
| Ge(27,0)        | 0.04              | -0.100            | 0.14          |

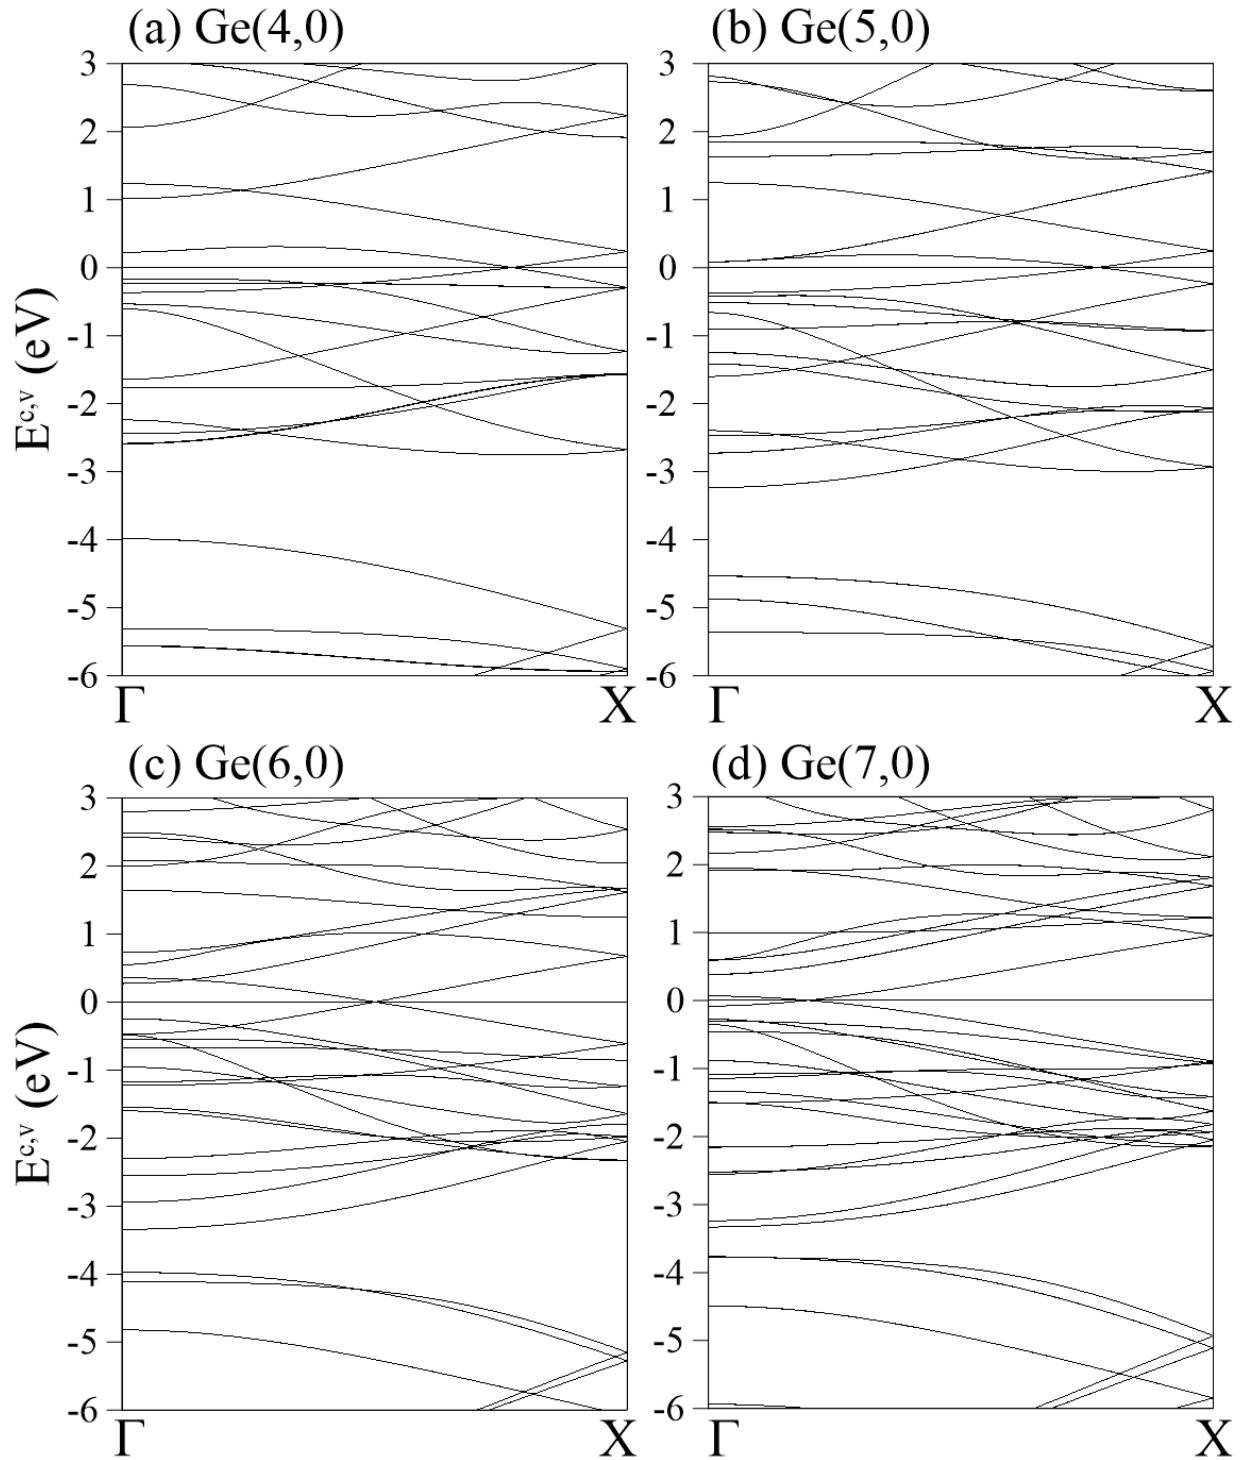

Figure S1: Band structures of metallic zGeNTs with different chiral vectors: (a) (4,0), (b) (5,0), (c) (6,0), and (d) (7,0).

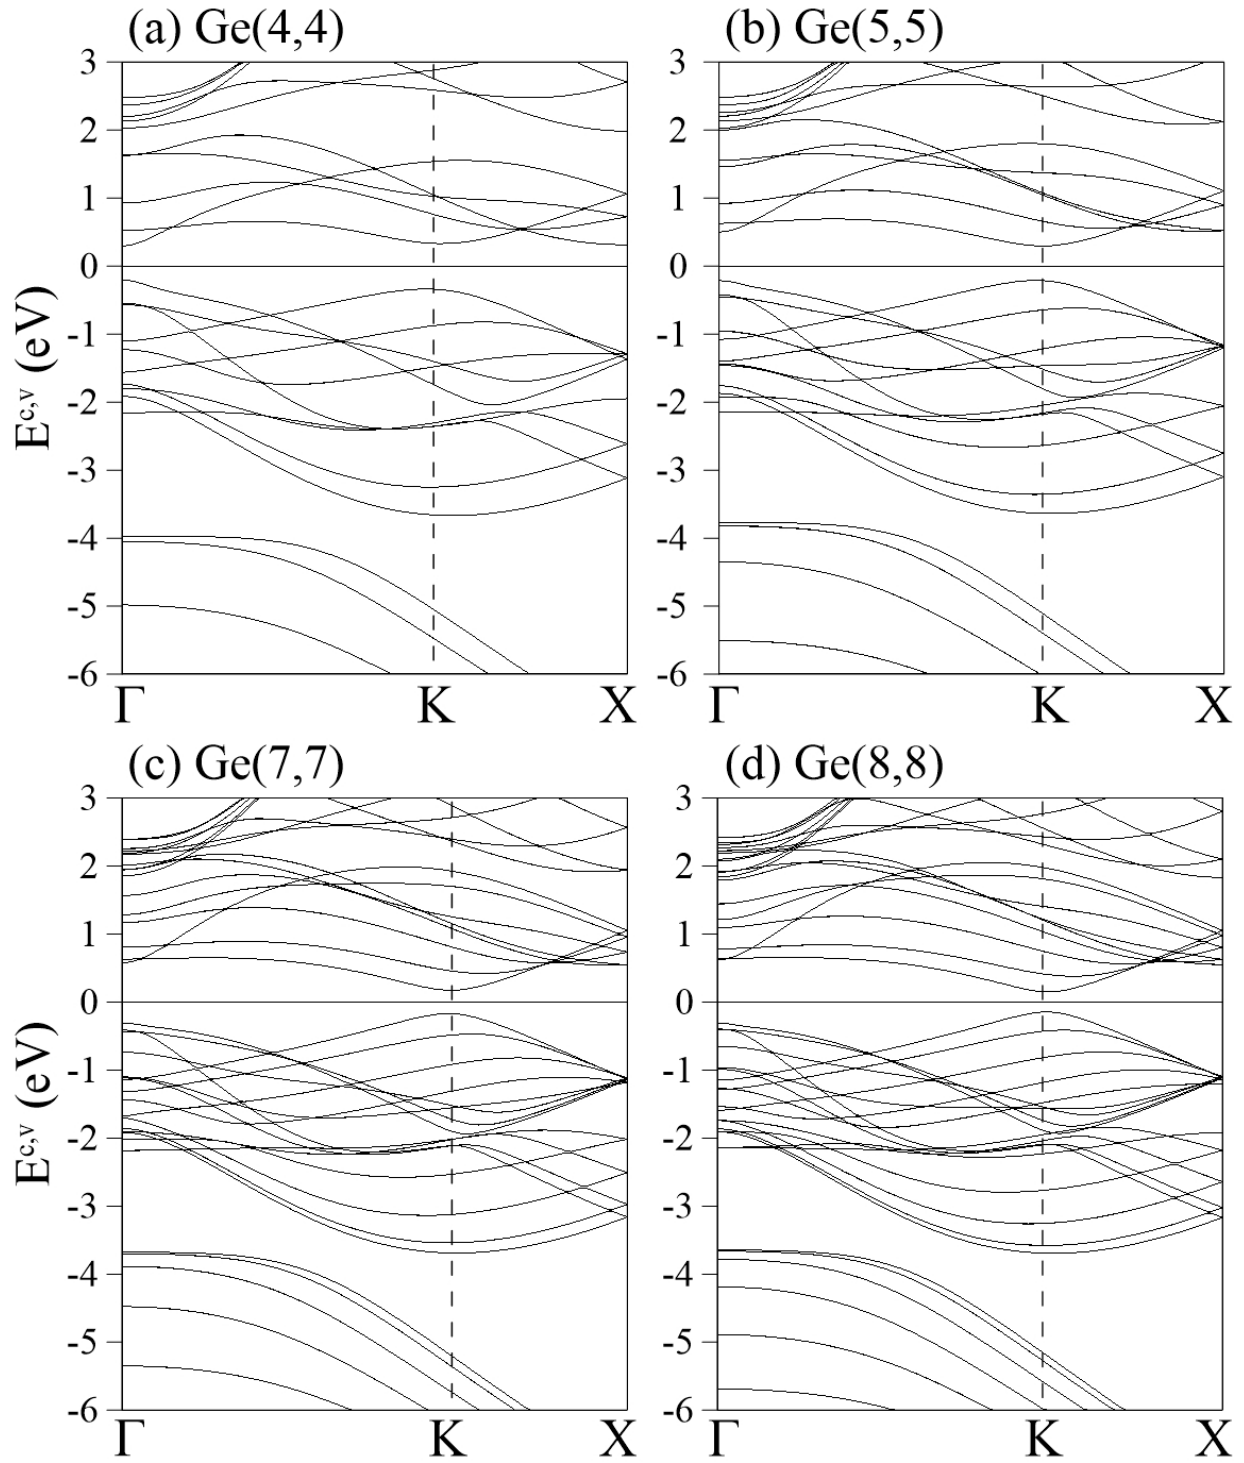

Figure S2: Band structures of aGeNTs with different chiral vectors: (a) (4,4), (b) (5,5), (c) (7,7), and (d) (8,8).

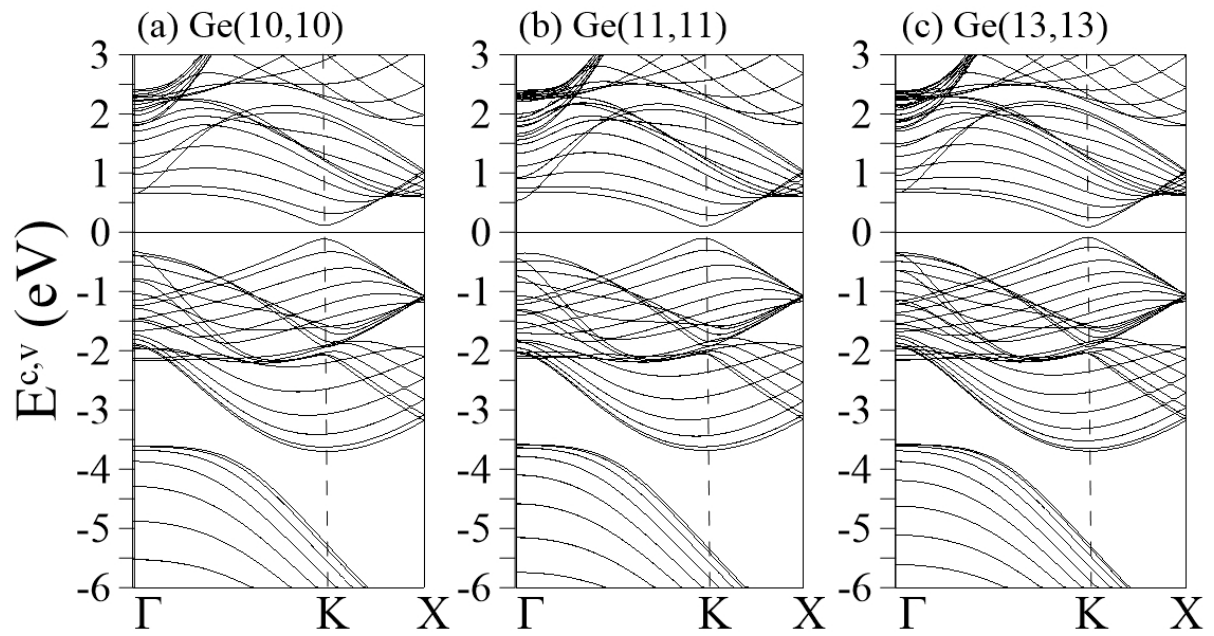

Figure S3: Band structures of aGeNTs with different chiral vectors: (a) (10,10), (b) (11,11), and (c) (13,13).

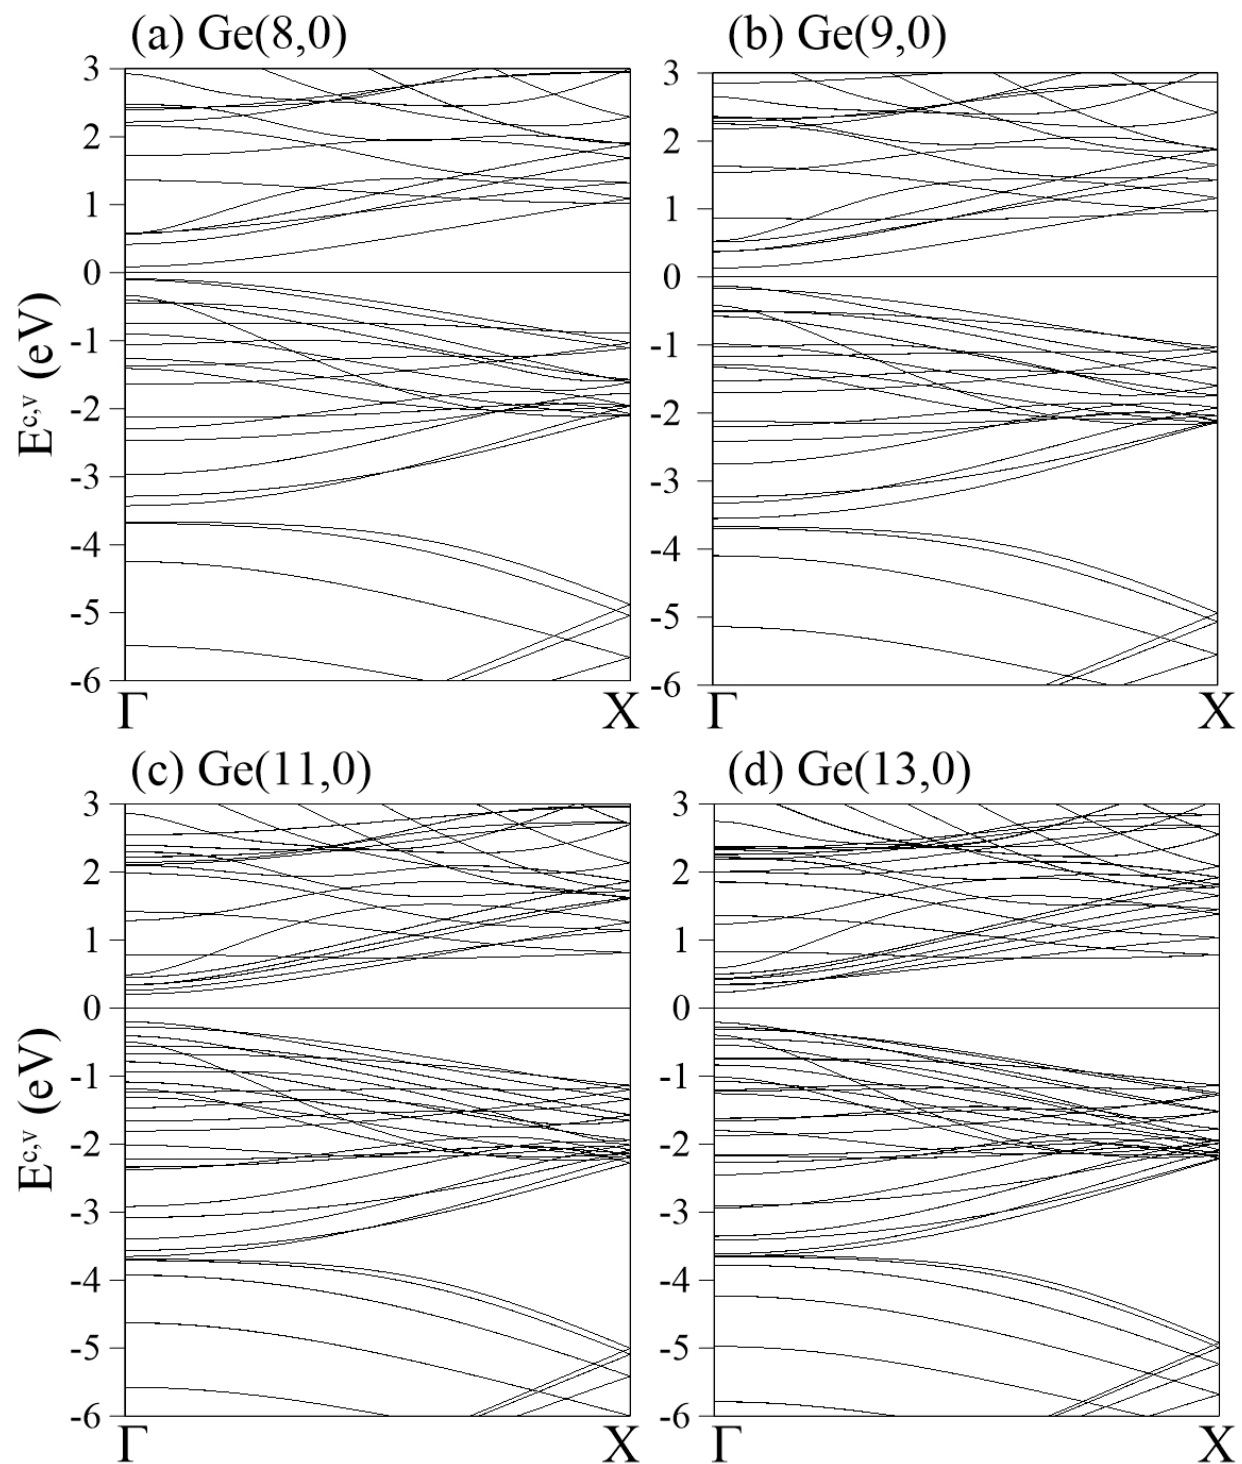

Figure S4: Band structures of zGeNTs with different chiral vectors: (a) (8,0), (b) (9,0), (c) (11,0), and (d) (13,0).
